# Supplementary material for: Structurally diverse penta- and hexacoordinate phosphorus compounds from the reaction of diethyl or diisopropyl azodicarboxylates with phosphorus(iii) compounds
Source: Royal Society of Chemistry journal article supplement (doi:10.1039/b514839a), 2006-01-01
Supplement: b514839a.pdf [file b514839a.pdf]

### Supplementary Information

**Authors:** K. V. P. Pavan Kumar, N. Satish Kumar, and K. C. Kumara Swamy

**Title:** Structurally diverse penta- and hexa-coordinate phosphorus compounds from the reaction of diethyl- or diisopropyl- azodicarboxylates with phosphorus(III) compounds

We have optimized the structures of the compounds presented in the following table at B3LYP/6-31G\* level<sup>1</sup> using Gaussian 03 program package.<sup>2</sup>

Table S1: Energies (au) of the optimized structures for **2**, **15**, **16** and **18**

| Input structure <sup>a</sup> | Total Optimized Energies of the Compounds |             |                |                |
|------------------------------|-------------------------------------------|-------------|----------------|----------------|
|                              | <b>2</b>                                  | <b>15</b>   | <b>16</b>      | <b>18</b>      |
| <b>I</b>                     | -2603.48652                               | -2642.81688 | -2929.11876    | -2694.53156    |
| <b>II</b>                    | -2603.47500                               | -2642.79752 | -2929.12508    | -2694.51646    |
| <b>III</b>                   | -2603.49209                               | -2642.82621 | -2929.12289    | -2694.51646    |
| <b>V</b>                     | -2603.49488                               | -2642.81895 | -2929.12979    | -2694.53748    |
| <b>VI</b>                    | -2603.48600                               | -2642.81390 | -2929.13438    | -2694.53840    |
| <b>VII</b>                   | -2603.50296                               | -2642.82358 | Not applicable | Not applicable |

<sup>a</sup> The coordinates from X-ray structures of **2**, **5**, **7**, **18** and **16** were used, respectively, for **I**, **II**, **III**, **V**, **VI** and **VII**. Modification of the substituents (like S replacing CH<sub>2</sub>) was then effected and the structure was optimized for minimum energy.

Energy in atomic units: 1 a.u. = 627.50 kcal/mol

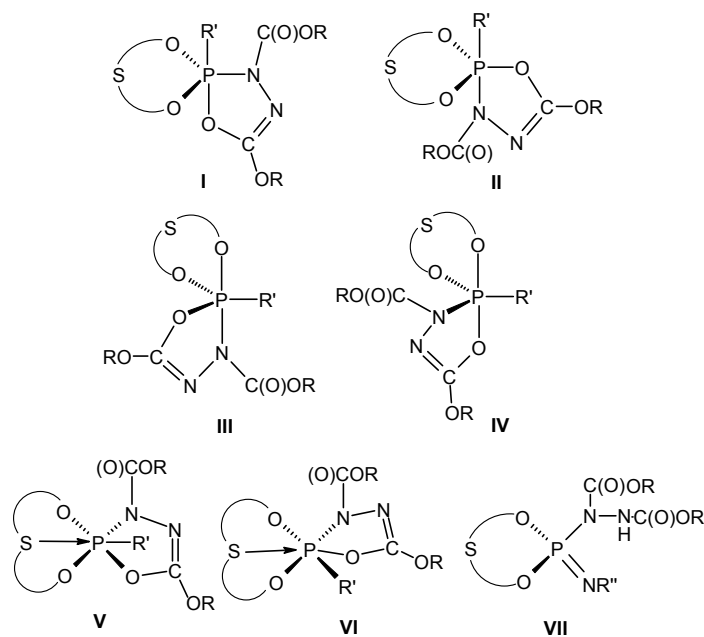

Chart. 5

- 1 a) A. D. Becke, *J. Chem. Phys.*, 1993, **98**, 5648; b) A. D. Becke *Phys. Rev. A*, 1988, **38**, 2398; c) C. Lee, W. Yang and R. G. Parr, *Phys. Rev. B*, 1988, **37**, 785.
- 2 Gaussian 03, Revision C.02, M. J. Frisch, G. W. Trucks, H. B. Schlegel, G. E. Scuseria, M. A. Robb, J. R. Cheeseman, J. A. Montgomery, Jr., T. Vreven, K. N. Kudin, J. C. Burant, J. M. Millam, S. S. Iyengar, J. Tomasi, V. Barone, B. Mennucci, M. Cossi, G. Scalmani, N. Rega, G. A. Petersson, H. Nakatsuji, M. Hada, M. Ehara, K. Toyota, R. Fukuda, J. Hasegawa, M. Ishida, T. Nakajima, Y. Honda, O. Kitao, H. Nakai, M. Klene, X. Li, J. E. Knox, H. P. Hratchian, J. B. Cross, V. Bakken, C. Adamo, J. Jaramillo, R. Gomperts, R. E. Stratmann, O. Yazyev, A. J. Austin, R. Cammi, C. Pomelli, J. W. Ochterski, P. Y. Ayala, K. Morokuma, G. A. Voth, P. Salvador, J. J. Dannenberg, V. G. Zakrzewski, S. Dapprich, A. D. Daniels, M. C. Strain, O. Farkas, D. K. Malick, A. D. Rabuck, K. Raghavachari, J. B. Foresman, J. V. Ortiz, Q. Cui, A. G. Baboul, S. Clifford, J. Cioslowski, B. B. Stefanov, G. Liu, A. Liashenko, P. Piskorz, I. Komaromi, R. L. Martin, D. J. Fox, T. Keith, M. A. Al-Laham, C. Y. Peng, A. Nanayakkara, M. Challacombe, P. M. W. Gill, B. Johnson, W. Chen, M. W. Wong, C. Gonzalez and J. A. Pople, Gaussian, Inc., Wallingford CT, 2004.
